# Supplementary material for: Kinetics and Mechanism of Liquid-State Polymerization of 2,4-Hexadiyne-1,6-diyl bis-(p-toluenesulfonate) as Studied by Thermal Analysis
Source: MDPI journal article supplement (doi:10.3390/polym16010007), 2023-12-19
Supplement: s1 [file s1]

# Kinetics and Mechanism of Liquid-State Polymerization of 2,4-Hexadiyne-1,6-diyl *bis*-(*p*-toluenesulfonate) as Studied by Thermal Analysis

Andrey Galukhin <sup>1,\*</sup>, Alexander Kachmarzhik <sup>1</sup>, Alexander Rodionov <sup>2</sup>, Georgy Mamin <sup>2</sup>, Marat Gafurov <sup>2</sup> and Sergey Vyazovkin <sup>3,\*</sup>

1. Alexander Butlerov Institute of Chemistry, Kazan Federal University, 18 Kremlevskaya Street, 420008 Kazan, Russia; sasha.kachma@mail.ru
2. Institute of Physics, Kazan Federal University, 18 Kremlevskaya Street, 420008 Kazan, Russia; rodionovshurik@yandex.ru (A.R.); georgemamin@gmail.com (G.M.); mgafurov@gmail.com (M.G.)
3. Department of Chemistry, University of Alabama at Birmingham, 901 S. 14th Street, Birmingham, AL 35294, USA

\* Correspondence: and\_galuhin@mail.ru (A.G.); vyazovkin@uab.edu (S.V.)

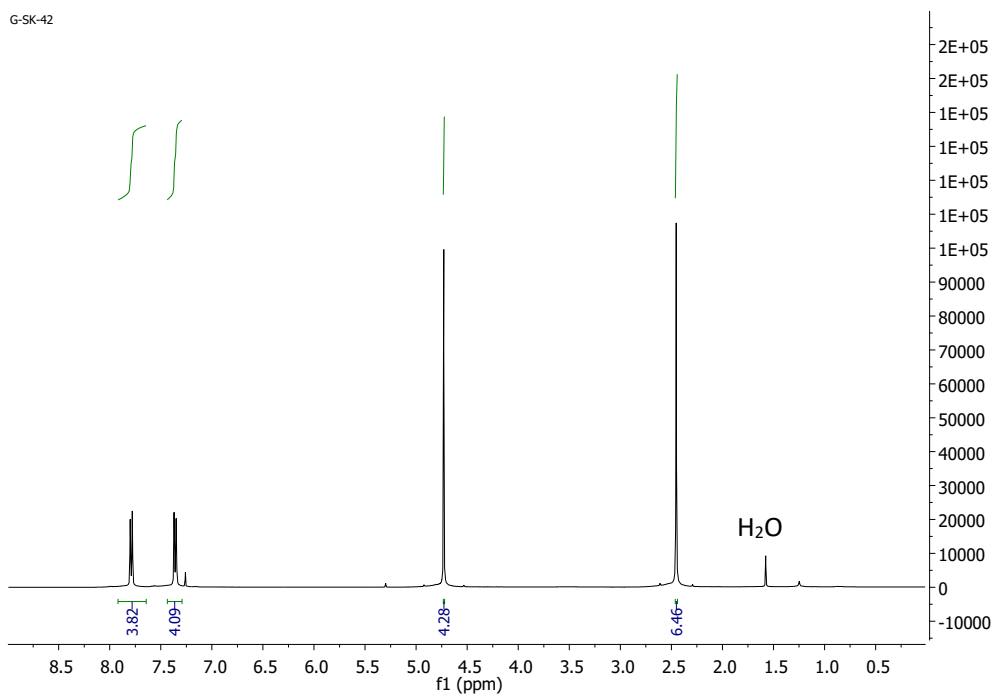

**Figure S1.** <sup>1</sup>H NMR spectrum of the 2,4-hexadiyne-1,6-diyl bis-(p-toluenesulfonate).

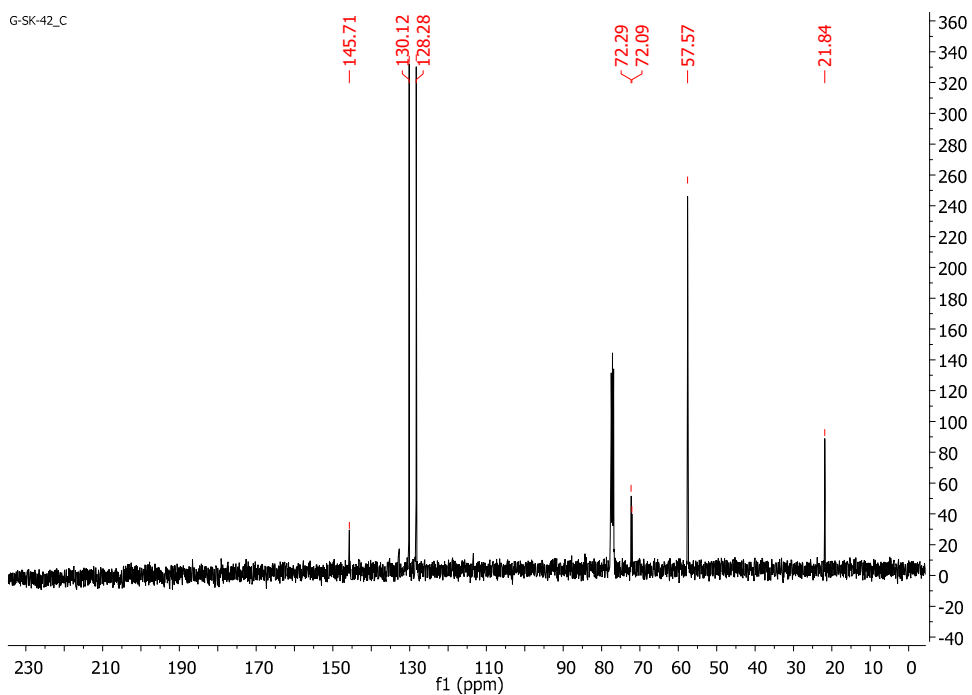

**Figure S2.** <sup>13</sup>C NMR spectrum of the 2,4-hexadiyne-1,6-diyl bis-(p-toluenesulfonate).

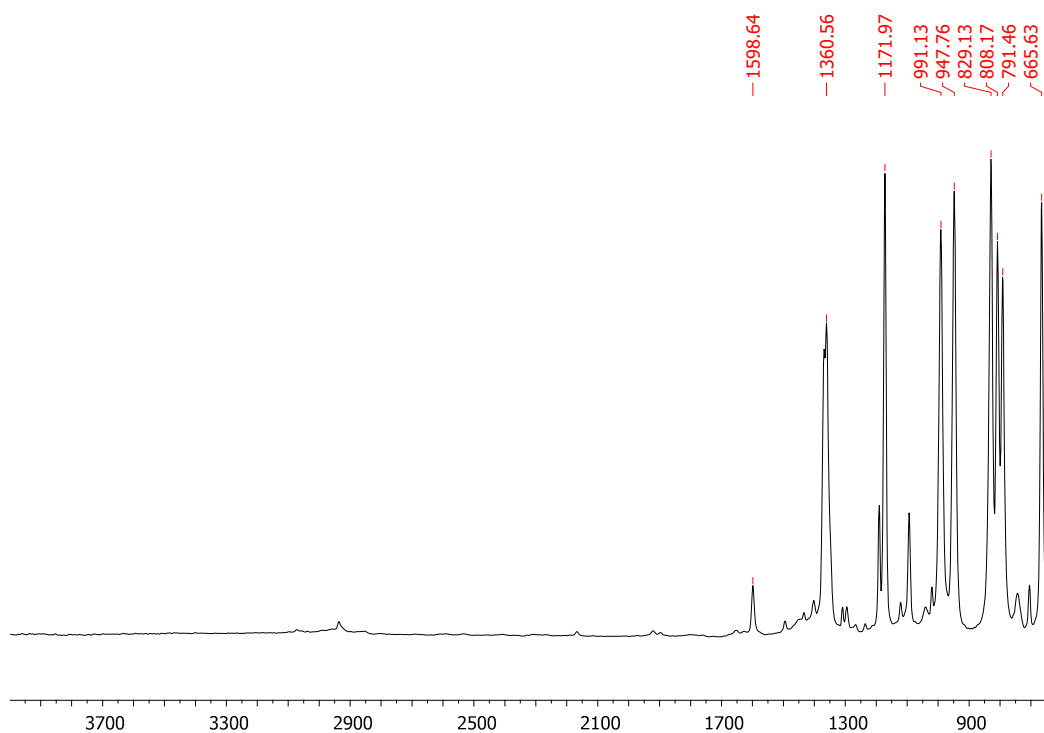

**Figure S3.** FTIR spectrum of 2,4-hexadiyne-1,6-diyl bis-(p-toluenesulfonate).

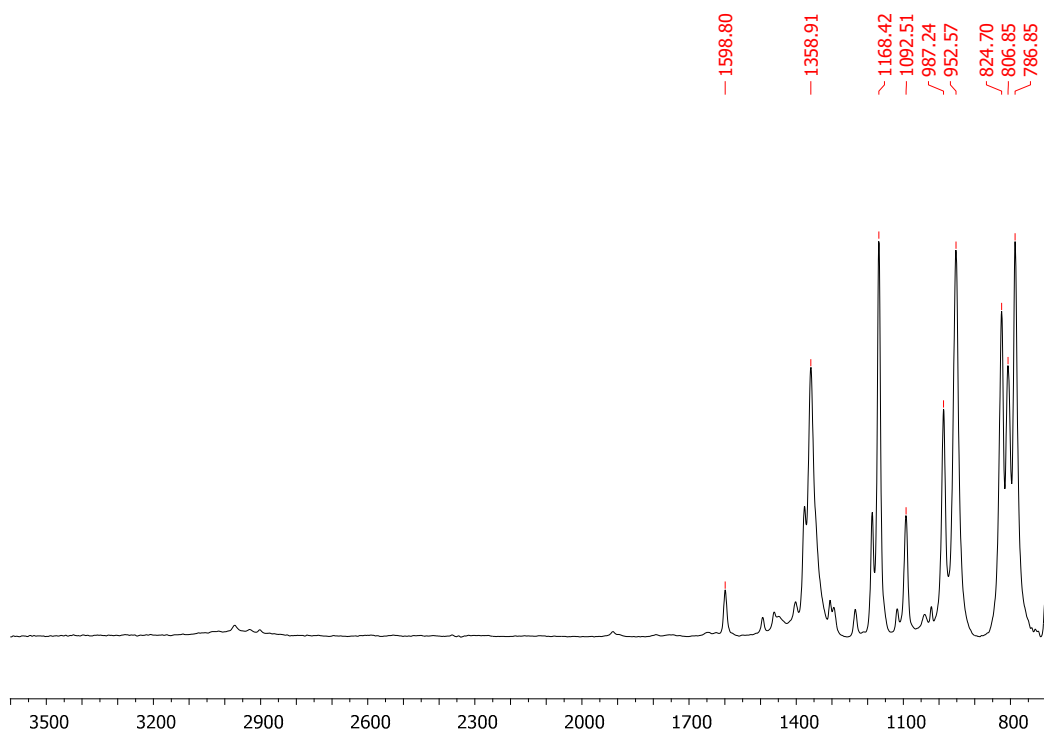

**Figure S4.** FTIR spectrum of the solid-state reaction product.

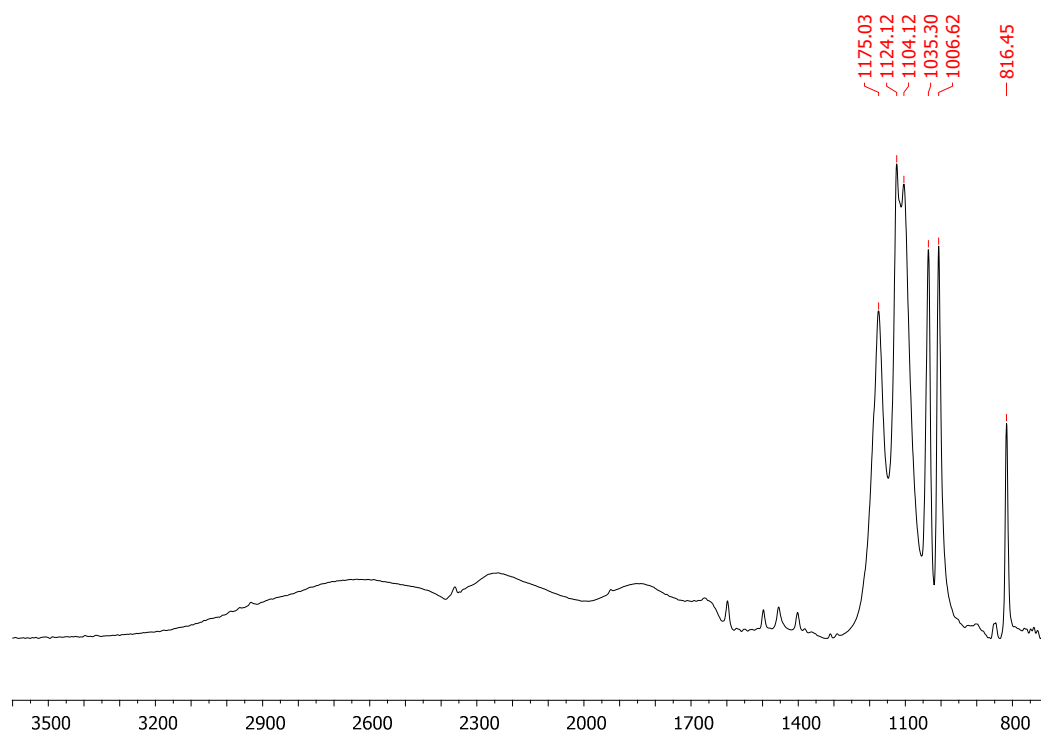

**Figure S5.** FTIR spectrum of the liquid-state reaction product.

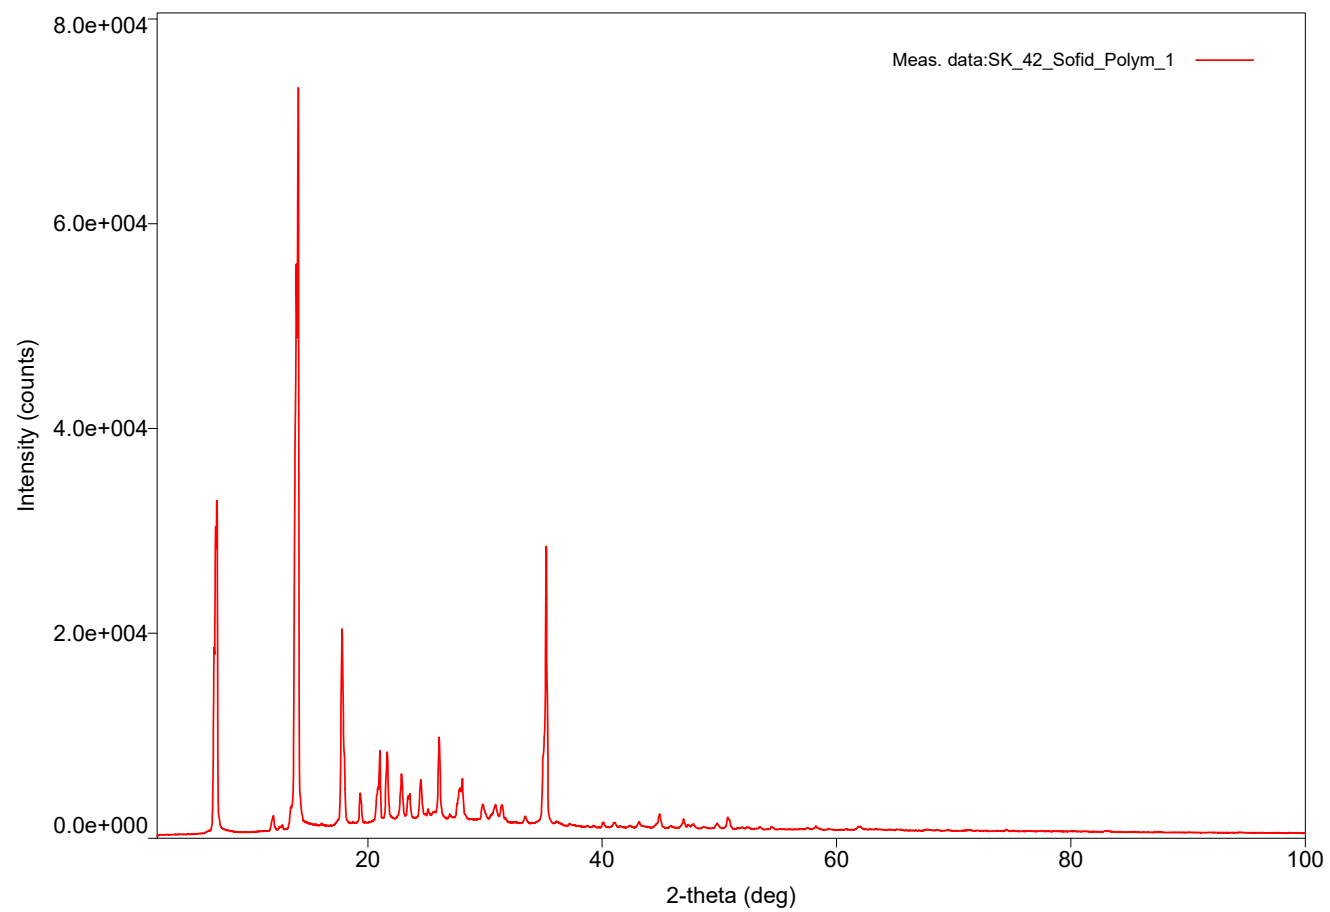

**Figure S6.** X-ray powder diffraction patterns of the solid-state reaction product.

**Table S1.** Parameters of the XRD patterns for the solid-state reaction product.

| No. | 2-theta(deg) | d(ang.)    | Height(counts) | FWHM(deg)  | Int. I(counts deg) | Int. W(deg) | Asym. factor |
|-----|--------------|------------|----------------|------------|--------------------|-------------|--------------|
| 1   | 6.880(4)     | 12.837(8)  | 11293(106)     | 0.22(6)    | 3068(729)          | 0.27(7)     | 0.5(2)       |
| 2   | 6.986(10)    | 12.642(17) | 9447(97)       | 0.12(6)    | 1412(1191)         | 0.15(13)    | 0.35(14)     |
| 3   | 7.144(3)     | 12.364(6)  | 17542(132)     | 0.12(3)    | 2496(1016)         | 0.14(6)     | 3.1(8)       |
| 4   | 11.936(6)    | 7.409(4)   | 943(31)        | 0.232(6)   | 259(5)             | 0.274(14)   | 2.7(4)       |
| 5   | 12.706(5)    | 6.961(3)   | 269(16)        | 0.285(15)  | 87(4)              | 0.32(3)     | 5.0(15)      |
| 6   | 13.451(5)    | 6.577(3)   | 1465(38)       | 0.80(2)    | 1381(58)           | 0.94(6)     | 0.202(19)    |
| 7   | 13.771(4)    | 6.4251(18) | 22835(151)     | 0.138(4)   | 3552(199)          | 0.156(10)   | 1.2(3)       |
| 8   | 13.8853(16)  | 6.3726(7)  | 32894(181)     | 0.144(8)   | 5453(378)          | 0.166(12)   | 0.58(8)      |
| 9   | 14.0678(9)   | 6.2903(4)  | 46113(215)     | 0.101(4)   | 5165(305)          | 0.112(7)    | 2.52(12)     |
| 10  | 17.692(4)    | 5.0090(12) | 3766(61)       | 0.075(11)  | 347(195)           | 0.09(5)     | 1.5(6)       |
| 11  | 17.783(4)    | 4.9838(11) | 12932(114)     | 0.155(19)  | 2464(307)          | 0.19(3)     | 0.7(2)       |
| 12  | 17.993(5)    | 4.9259(14) | 3585(60)       | 0.15(4)    | 669(194)           | 0.19(6)     | 1.8(8)       |
| 13  | 19.323(3)    | 4.5899(8)  | 1990(45)       | 0.176(4)   | 407(7)             | 0.205(8)    | 0.45(4)      |
| 14  | 20.714(11)   | 4.285(2)   | 1258(35)       | 0.15(2)    | 236(24)            | 0.19(2)     | 0.7(2)       |
| 15  | 20.849(12)   | 4.257(2)   | 1743(42)       | 0.183(14)  | 394(269)           | 0.23(16)    | 0.61(18)     |
| 16  | 21.0296(15)  | 4.2210(3)  | 4738(69)       | 0.096(3)   | 558(23)            | 0.118(6)    | 2.19(16)     |
| 17  | 21.541(5)    | 4.1220(10) | 2722(52)       | 0.11(2)    | 403(112)           | 0.15(4)     | 0.8(3)       |
| 18  | 21.640(4)    | 4.1032(8)  | 4196(65)       | 0.132(6)   | 735(113)           | 0.18(3)     | 0.57(11)     |
| 19  | 22.873(4)    | 3.8848(7)  | 2877(54)       | 0.217(3)   | 785(8)             | 0.273(8)    | 1.55(13)     |
| 20  | 23.391(4)    | 3.8000(7)  | 1419(38)       | 0.210(19)  | 327(20)            | 0.23(2)     | 0.34(10)     |
| 21  | 23.582(10)   | 3.7697(15) | 1062(33)       | 0.082(14)  | 98(23)             | 0.09(2)     | 1.0(4)       |
| 22  | 24.437(10)   | 3.6396(14) | 1898(44)       | 0.16(3)    | 320(61)            | 0.17(4)     | 0.8(2)       |
| 23  | 24.501(9)    | 3.6303(13) | 1298(36)       | 0.172(16)  | 237(62)            | 0.18(5)     | 0.20(8)      |
| 24  | 25.13(2)     | 3.541(3)   | 426(21)        | 0.12(3)    | 69(8)              | 0.16(3)     | 0.9(8)       |
| 25  | 26.079(4)    | 3.4141(5)  | 5012(71)       | 0.157(3)   | 836(26)            | 0.167(8)    | 1.33(12)     |
| 26  | 26.190(16)   | 3.400(2)   | 426(21)        | 0.74(5)    | 337(20)            | 0.79(9)     | 4.8(13)      |
| 27  | 27.799(10)   | 3.2066(12) | 1853(43)       | 0.441(8)   | 869(15)            | 0.469(19)   | 0.65(6)      |
| 28  | 28.075(5)    | 3.1758(5)  | 1833(43)       | 0.096(6)   | 188(13)            | 0.103(9)    | 2.3(5)       |
| 29  | 29.730(8)    | 3.0026(8)  | 1033(32)       | 0.300(9)   | 379(15)            | 0.37(3)     | 0.26(4)      |
| 30  | 30.891(10)   | 2.8924(9)  | 963(31)        | 0.425(12)  | 495(10)            | 0.51(3)     | 2.0(2)       |
| 31  | 31.446(9)    | 2.8425(8)  | 1162(34)       | 0.246(9)   | 347(12)            | 0.298(19)   | 1.9(4)       |
| 32  | 31.741(16)   | 2.8169(14) | 274(17)        | 0.11(3)    | 35(7)              | 0.13(3)     | 1.9(13)      |
| 33  | 33.419(13)   | 2.6791(10) | 502(22)        | 0.202(17)  | 134(6)             | 0.27(2)     | 1.1(4)       |
| 34  | 34.939(4)    | 2.5659(3)  | 4443(67)       | 0.308(9)   | 1680(37)           | 0.378(14)   | 0.27(2)      |
| 35  | 35.2302(6)   | 2.54542(4) | 20853(144)     | 0.1058(10) | 2887(46)           | 0.138(3)    | 2.04(5)      |
| 36  | 36.08(3)     | 2.487(2)   | 188(14)        | 0.42(4)    | 98(7)              | 0.52(8)     | 0.39(14)     |
| 37  | 37.184(11)   | 2.4160(7)  | 169(13)        | 0.21(3)    | 68(4)              | 0.40(5)     | 0.32(9)      |
| 38  | 40.063(18)   | 2.2488(10) | 376(19)        | 0.154(17)  | 63(5)              | 0.17(2)     | 0.9(4)       |

|    |            |             |         |           |        |           |          |
|----|------------|-------------|---------|-----------|--------|-----------|----------|
| 39 | 41.02(2)   | 2.1984(12)  | 341(18) | 0.23(2)   | 96(6)  | 0.28(3)   | 1.2(6)   |
| 40 | 43.11(3)   | 2.0968(14)  | 397(20) | 0.21(4)   | 125(8) | 0.31(4)   | 1.0(6)   |
| 41 | 44.850(8)  | 2.0193(3)   | 994(32) | 0.208(12) | 295(8) | 0.297(17) | 0.76(14) |
| 42 | 45.787(19) | 1.9801(8)   | 160(13) | 0.15(3)   | 29(4)  | 0.18(4)   | 0.4(3)   |
| 43 | 46.969(6)  | 1.9330(2)   | 578(24) | 0.209(8)  | 141(4) | 0.245(16) | 4.8(10)  |
| 44 | 47.368(10) | 1.9176(4)   | 249(16) | 0.159(17) | 47(3)  | 0.19(3)   | 3.2(12)  |
| 45 | 47.794(10) | 1.9015(4)   | 300(17) | 0.218(17) | 77(4)  | 0.26(3)   | 4.2(12)  |
| 46 | 48.57(3)   | 1.8729(13)  | 86(9)   | 0.24(4)   | 22(4)  | 0.25(7)   | 0.3(2)   |
| 47 | 49.809(13) | 1.8292(5)   | 363(19) | 0.226(13) | 95(4)  | 0.26(2)   | 1.7(4)   |
| 48 | 50.690(7)  | 1.7995(2)   | 886(30) | 0.207(7)  | 229(6) | 0.258(16) | 0.36(7)  |
| 49 | 51.97(3)   | 1.7582(8)   | 112(11) | 0.19(4)   | 33(5)  | 0.30(7)   | 2.8(18)  |
| 50 | 52.35(2)   | 1.7462(7)   | 137(12) | 0.19(3)   | 33(3)  | 0.24(5)   | 0.4(2)   |
| 51 | 53.458(10) | 1.7126(3)   | 163(13) | 0.16(3)   | 31(4)  | 0.19(4)   | 1.4(9)   |
| 52 | 54.461(13) | 1.6835(4)   | 236(15) | 0.132(13) | 33(4)  | 0.14(3)   | 1.1(5)   |
| 53 | 57.416(13) | 1.6036(3)   | 129(11) | 0.17(4)   | 36(5)  | 0.28(6)   | 0.20(10) |
| 54 | 58.221(13) | 1.5833(3)   | 237(15) | 0.19(3)   | 78(5)  | 0.33(4)   | 0.8(2)   |
| 55 | 61.82(3)   | 1.4995(8)   | 238(15) | 0.40(6)   | 160(7) | 0.67(7)   | 0.37(18) |
| 56 | 67.71(2)   | 1.3827(4)   | 95(10)  | 0.13(3)   | 17(3)  | 0.18(5)   | 1.4(14)  |
| 57 | 82.907(9)  | 1.16357(10) | 86(9)   | 0.31(3)   | 30(3)  | 0.34(7)   | 0.20(12) |

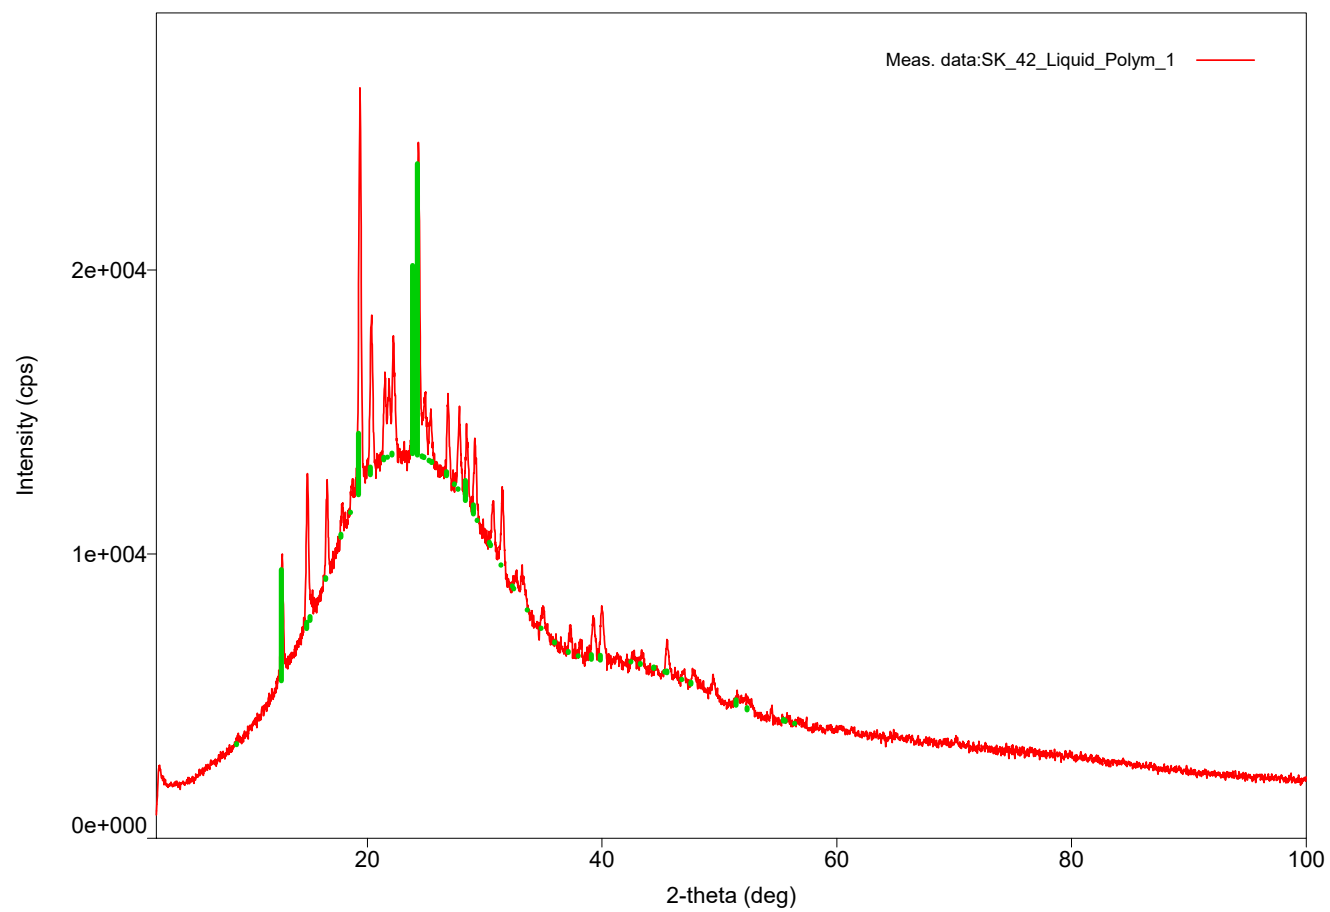

**Figure S7.** X-ray powder diffraction patterns of the liquid-state reaction product. Green patterns correspond to *p*-toluenesulfonic acid hydrate (DB card number 00-054-2253).



**Table S2.** Parameters of the XRD patterns for the liquid-state reaction product.

| No. | 2-theta(deg) | d(ang.)    | Height(counts) | FWHM(deg) | Int. I(counts deg) | Int. W(deg) | Asym. factor |
|-----|--------------|------------|----------------|-----------|--------------------|-------------|--------------|
| 1   | 12.731(6)    | 6.948(4)   | 705(27)        | 0.222(6)  | 207(4)             | 0.294(17)   | 1.14(15)     |
| 2   | 14.885(7)    | 5.947(3)   | 903(30)        | 0.214(7)  | 269(6)             | 0.298(16)   | 1.10(17)     |
| 3   | 16.545(11)   | 5.354(4)   | 502(22)        | 0.200(9)  | 107(6)             | 0.21(2)     | 0.9(2)       |
| 4   | 17.84(3)     | 4.968(9)   | 158(13)        | 0.18(3)   | 30(6)              | 0.19(5)     | 1.1(2)       |
| 5   | 18.588(10)   | 4.770(3)   | 126(11)        | 0.21(4)   | 33(5)              | 0.26(6)     | 0.2(2)       |
| 6   | 19.359(3)    | 4.5813(8)  | 2335(48)       | 0.215(3)  | 614(7)             | 0.263(9)    | 1.07(7)      |
| 7   | 20.323(9)    | 4.3661(19) | 875(30)        | 0.240(8)  | 241(8)             | 0.275(19)   | 0.88(14)     |
| 8   | 21.454(8)    | 4.1385(15) | 363(19)        | 0.69(4)   | 267(12)            | 0.74(7)     | 0.20(5)      |
| 9   | 22.202(4)    | 4.0007(7)  | 545(23)        | 0.217(11) | 128(8)             | 0.23(3)     | 0.64(15)     |
| 10  | 23.906(10)   | 3.7192(15) | 725(27)        | 0.254(12) | 196(10)            | 0.27(2)     | 0.77(13)     |
| 11  | 24.330(5)    | 3.6553(7)  | 1758(42)       | 0.239(5)  | 448(17)            | 0.255(16)   | 0.99(8)      |
| 12  | 24.92(2)     | 3.570(3)   | 333(18)        | 0.39(4)   | 139(15)            | 0.42(7)     | 2.2(7)       |
| 13  | 25.37(2)     | 3.508(3)   | 273(17)        | 0.27(2)   | 77(5)              | 0.28(4)     | 1.0(3)       |
| 14  | 26.841(14)   | 3.3188(17) | 463(22)        | 0.212(10) | 106(6)             | 0.23(2)     | 0.7(2)       |
| 15  | 27.806(13)   | 3.2058(15) | 431(21)        | 0.259(13) | 129(5)             | 0.30(3)     | 0.77(16)     |
| 16  | 28.449(14)   | 3.1348(15) | 402(20)        | 0.254(13) | 118(4)             | 0.29(3)     | 0.84(18)     |
| 17  | 29.146(13)   | 3.0615(13) | 433(21)        | 0.241(11) | 120(4)             | 0.28(2)     | 0.75(16)     |
| 18  | 30.71(3)     | 2.909(2)   | 276(17)        | 0.24(2)   | 80(6)              | 0.29(4)     | 1.5(8)       |
| 19  | 31.49(2)     | 2.8391(17) | 452(21)        | 0.227(15) | 118(8)             | 0.26(3)     | 0.9(3)       |
| 20  | 33.17(2)     | 2.6985(17) | 144(12)        | 0.45(6)   | 97(9)              | 0.67(12)    | 0.7(4)       |
| 21  | 34.99(4)     | 2.562(3)   | 130(11)        | 0.24(6)   | 42(6)              | 0.32(8)     | 2(2)         |
| 22  | 37.28(5)     | 2.410(3)   | 156(12)        | 0.21(5)   | 40(7)              | 0.25(6)     | 1.6(18)      |
| 23  | 39.26(2)     | 2.2927(13) | 238(15)        | 0.30(3)   | 92(5)              | 0.38(5)     | 1.5(4)       |
| 24  | 39.956(6)    | 2.2546(3)  | 316(18)        | 0.299(19) | 115(5)             | 0.37(4)     | 0.8(2)       |
| 25  | 45.55(2)     | 1.9899(10) | 207(14)        | 0.21(3)   | 54(4)              | 0.26(4)     | 1.7(9)       |
| 26  | 47.69(6)     | 1.905(2)   | 87(9)          | 0.34(11)  | 48(5)              | 0.55(12)    | 0.2(3)       |
| 27  | 49.50(2)     | 1.8398(8)  | 111(11)        | 0.21(3)   | 31(3)              | 0.28(6)     | 3.2(11)      |
| 28  | 52.09(12)    | 1.754(4)   | 57(8)          | 1.18(10)  | 72(9)              | 1.3(3)      | 1.1(5)       |

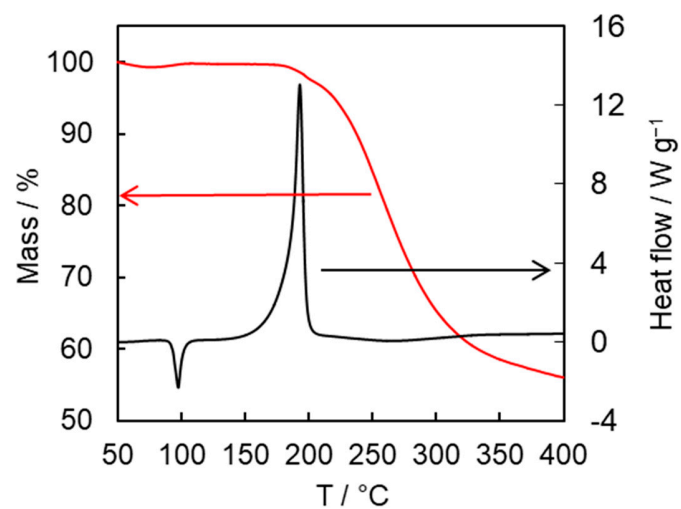

**Figure S8.** TG and DSC curves for liquid-state polymerization of the studied monomer measured at 10 °C min<sup>-1</sup>.
